# Supplementary material for: Controversies in the management of hepatocellular carcinoma
Source: PubMed Central journal article supplement — JHEP Rep. 2019 Mar 18;1(1):17–29. doi: 10.1016/j.jhepr.2019.02.003 (PMC7001551; doi:10.1016/j.jhepr.2019.02.003), 2019-03-18
Supplement: mmc1.pdf [file mmc1.pdf]

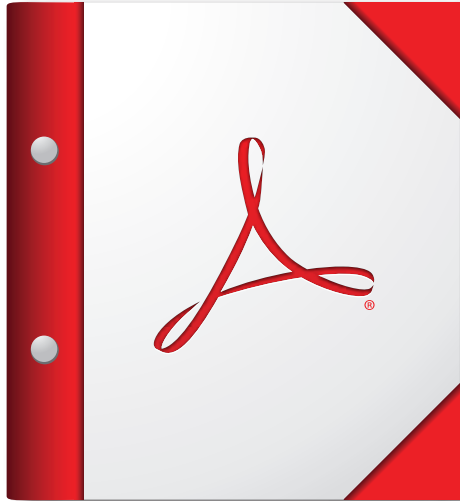

**For the best experience, open this PDF portfolio in  
Acrobat X or Adobe Reader X, or later.**

[Get Adobe Reader Now!](#)
